# Supplementary material for: Objective Assessment of the Nature and Extent of Children’s Internet-Based World: Protocol for the Kids Online Aotearoa Study
Source: PubMed Central journal article supplement (PMC9597417; doi:10.2196/39017), 2022-10-11
Supplement: resprot_v11i10e39017_app1.pdf [file resprot_v11i10e39017_app1.pdf]

# NZ Kids Online - Questionnaire #1

Hi :)

Remember, all of your answers will be kept private and your name will not be recorded.

Please take your time and answer as honestly as possible. By completing this questionnaire, you are contributing to pioneering research.

Thank you for making this possible!

Please complete all of the following questions.

---

Please enter the ID code that was assigned to you:

\_\_\_\_\_

(Please take the time to enter this correctly. This code is used instead of your name to ensure that the answers you provide remain confidential)

---

1.) - Imagine that you are the Prime Minister for a day. This is your opportunity to make changes to the online world. What would you change about the online world, and why?

\_\_\_\_\_

(Something you would change, and why you would change it.....)

**2.) - Are you able to go online (use the internet) whenever you WANT to, while in the following locations?****(Make one selection per question)**

|                                                        | never                 | hardly ever           | sometimes             | often                 | very often            | always                |
|--------------------------------------------------------|-----------------------|-----------------------|-----------------------|-----------------------|-----------------------|-----------------------|
| 2.a) - At home?                                        | <input type="radio"/> | <input type="radio"/> | <input type="radio"/> | <input type="radio"/> | <input type="radio"/> | <input type="radio"/> |
| 2.b) - At school?                                      | <input type="radio"/> | <input type="radio"/> | <input type="radio"/> | <input type="radio"/> | <input type="radio"/> | <input type="radio"/> |
| 2.c) - Out in public, or while using public transport? | <input type="radio"/> | <input type="radio"/> | <input type="radio"/> | <input type="radio"/> | <input type="radio"/> | <input type="radio"/> |

**3.) - Are you able to go online (using the internet) whenever you NEED to, while in the following locations?**

**(Make one selection per question)**

|                                                        | Never                 | Hardly ever           | Sometimes             | Often                 | Very often            | Always                |
|--------------------------------------------------------|-----------------------|-----------------------|-----------------------|-----------------------|-----------------------|-----------------------|
| 3.a) - At home?                                        | <input type="radio"/> | <input type="radio"/> | <input type="radio"/> | <input type="radio"/> | <input type="radio"/> | <input type="radio"/> |
| 3.b) - At school?                                      | <input type="radio"/> | <input type="radio"/> | <input type="radio"/> | <input type="radio"/> | <input type="radio"/> | <input type="radio"/> |
| 3.c) - Out in public, or while using public transport? | <input type="radio"/> | <input type="radio"/> | <input type="radio"/> | <input type="radio"/> | <input type="radio"/> | <input type="radio"/> |

4.a) - Which of the following devices do you have access to at home?

(it doesn't need to be a device you use, it just has to be one that is at your home)

- TV
  - Desktop computer
  - Laptop
  - Tablet/iPad
  - Mobile phone
  - Gaming console
  - Kindle/E-Reader
  - Other(s)
  - None
- (Select all that apply)

What is/are the other device(s) you use?

\_\_\_\_\_  
(Please list here )

**4.b) - Of those devices that you have access to at your home - which do you actually use to explore online?**

TV  Yes  
 No

Desktop computer  Yes  
 No

Laptop  Yes  
 No

Tablet/iPad  Yes  
 No

Mobile phone  Yes  
 No

Gaming console  Yes  
 No

Kindle/E-reader  Yes  
 No

4.c) - You said that you have access to these 'other' devices at your house; [ac\_dshome\_other4a].

\_\_\_\_\_ (Please list here )

Which of them do you actually use to explore online?

5.) - How frequently do you go online when you are at home?

- Almost all the time (I go online very often)  
 More than once an hour  
 At least once an hour  
 Several times each day  
 Daily or almost daily  
 At least every week  
 At least every month  
 Once or twice a year  
 Never  
 Don't know  
(Pick one - the most relevant to you)

6.a) - Which of the following devices do you have access to at school?

(it doesn't need to be a device you actually use, but one that is available to use if you needed or wanted to)

- TV  
 Desktop computer  
 Laptop  
 Tablet/iPad  
 Mobile phone  
 Gaming console  
 Kindle/E-Reader  
 Other  
 None  
(Select all that apply)

What is/are the other device(s) you use?

\_\_\_\_\_ (Please type here )

**6.b) - Of those devices that you have access to at your school - which do you actually use to explore online?**

TV  Yes  
 No

Desktop computer  Yes  
 No

Laptop  Yes  
 No

Tablet/iPad  Yes  
 No

Mobile phone  Yes  
 No

Gaming console  Yes  
 No

Kindle/E-reader  Yes  
 No

6.c) - You said that you have access to these 'other' devices at your school; [ac\_dschool\_oth6a].

\_\_\_\_\_ (Please list here )

Which of them do you actually use to explore online?

7.) - How often do you go online when you are at school?

- Almost all the time (I go online very often)  
 More than once an hour  
 At least once an hour  
 Several times each day  
 Daily or almost daily  
 At least every week  
 At least every month  
 Once or twice a year  
 Never  
 Don't know  
(Pick one - the most relevant to you)

8.a) - What is your favourite device to use to go online?

- TV  
 Desktop computer  
 Laptop  
 Tablet/iPad  
 Mobile phone  
 Gaming console  
 Kindle/E-Reader  
 Other  
 Don't really mind/no preference  
 Don't know  
(Pick one)

---

What is the 'other' device that is your favourite?

---

(Please type here )

---

8.b) - Why is that device your favourite?

---

(A short answer is absolutely fine)

**9.) - While online (using the internet), how often do you see the following:****(Make one selection per question)**

|                                              | More than<br>once daily | At least<br>once every<br>day | At least<br>once every<br>week | Once or<br>twice a<br>month | Once or<br>twice a<br>year | Never                 | Don't know            |
|----------------------------------------------|-------------------------|-------------------------------|--------------------------------|-----------------------------|----------------------------|-----------------------|-----------------------|
| 9a.) - Alcohol or alcohol marketing?         | <input type="radio"/>   | <input type="radio"/>         | <input type="radio"/>          | <input type="radio"/>       | <input type="radio"/>      | <input type="radio"/> | <input type="radio"/> |
| 9b.) - Gambling or marketing for gambling?   | <input type="radio"/>   | <input type="radio"/>         | <input type="radio"/>          | <input type="radio"/>       | <input type="radio"/>      | <input type="radio"/> | <input type="radio"/> |
| 9c.) - Junk food or marketing for junk food? | <input type="radio"/>   | <input type="radio"/>         | <input type="radio"/>          | <input type="radio"/>       | <input type="radio"/>      | <input type="radio"/> | <input type="radio"/> |

10.) - Do your parents limit the amount of time you're allowed to spend online on school days (Monday-Friday)?

- Every day  
 Sometimes, somedays  
 Never  
 I don't know  
 (Pick one)

**11.) - On a typical day during the school week (Monday-Friday), what is the total time you spend online (using the internet).....**

**(Make one selection per question)**

|                                                                                     | None                  | 0-9<br>minutes        | 10-19<br>minutes      | 20-29<br>minutes      | 30-45<br>minutes      | About<br>an hour      | 1-2<br>hours          | 2-4<br>hours          | 4+<br>hours           | Don't<br>know         |
|-------------------------------------------------------------------------------------|-----------------------|-----------------------|-----------------------|-----------------------|-----------------------|-----------------------|-----------------------|-----------------------|-----------------------|-----------------------|
| 11a.) - While at home?                                                              | <input type="radio"/> | <input type="radio"/> | <input type="radio"/> | <input type="radio"/> | <input type="radio"/> | <input type="radio"/> | <input type="radio"/> | <input type="radio"/> | <input type="radio"/> | <input type="radio"/> |
| 11b.) - While at school?                                                            | <input type="radio"/> | <input type="radio"/> | <input type="radio"/> | <input type="radio"/> | <input type="radio"/> | <input type="radio"/> | <input type="radio"/> | <input type="radio"/> | <input type="radio"/> | <input type="radio"/> |
| 11c.) - While in public spaces<br>(not including public transport)?                 | <input type="radio"/> | <input type="radio"/> | <input type="radio"/> | <input type="radio"/> | <input type="radio"/> | <input type="radio"/> | <input type="radio"/> | <input type="radio"/> | <input type="radio"/> | <input type="radio"/> |
| 11d.) - While travelling in any<br>type of vehicle (including public<br>transport)? | <input type="radio"/> | <input type="radio"/> | <input type="radio"/> | <input type="radio"/> | <input type="radio"/> | <input type="radio"/> | <input type="radio"/> | <input type="radio"/> | <input type="radio"/> | <input type="radio"/> |

12.) - Do your parents limit the amount of time you're allowed to spend online on weekend days? (Saturdays and Sundays)?

- Yes - On Saturday but NOT Sunday  
 Yes - On Sunday but NOT Saturday  
 Yes - on BOTH Saturday & Sunday  
 No - they don't limit the amount of time I spend online on either Saturday or Sunday  
 I don't know  
 (Pick one - the most relevant to you)



**13.) - On a typical weekend day (Saturday & Sunday), what is the total amount of time you spend online (using the internet).....**

**(Make one selection per question)**

|                                                                                     | None                  | 0-9<br>minutes        | 10-19<br>minutes      | 20-29<br>minutes      | 30-45<br>minutes      | About<br>an hour      | 1-2<br>hours          | 2-4<br>hours          | 4+<br>hours           | Don't<br>know         |
|-------------------------------------------------------------------------------------|-----------------------|-----------------------|-----------------------|-----------------------|-----------------------|-----------------------|-----------------------|-----------------------|-----------------------|-----------------------|
| 13a.) - While at home?                                                              | <input type="radio"/> | <input type="radio"/> | <input type="radio"/> | <input type="radio"/> | <input type="radio"/> | <input type="radio"/> | <input type="radio"/> | <input type="radio"/> | <input type="radio"/> | <input type="radio"/> |
| 13b.) - While in public spaces<br>(not including public transport)?                 | <input type="radio"/> | <input type="radio"/> | <input type="radio"/> | <input type="radio"/> | <input type="radio"/> | <input type="radio"/> | <input type="radio"/> | <input type="radio"/> | <input type="radio"/> | <input type="radio"/> |
| 13c.) - While travelling in any<br>type of vehicle (including public<br>transport)? | <input type="radio"/> | <input type="radio"/> | <input type="radio"/> | <input type="radio"/> | <input type="radio"/> | <input type="radio"/> | <input type="radio"/> | <input type="radio"/> | <input type="radio"/> | <input type="radio"/> |

**14.) - Do your parents have rules or limits about the amount of time you spend using screens for these activities?**

**(Make one selection per activity)**

|                                                                                                | Yes                   | No                    | Don't know            |
|------------------------------------------------------------------------------------------------|-----------------------|-----------------------|-----------------------|
| 14.a) - Watching TV or DVDs                                                                    | <input type="radio"/> | <input type="radio"/> | <input type="radio"/> |
| 14.b) - Streaming video<br>(Netflix/Prime<br>Video/Lightbox/YouTube etc.)                      | <input type="radio"/> | <input type="radio"/> | <input type="radio"/> |
| 14.c) - Gaming                                                                                 | <input type="radio"/> | <input type="radio"/> | <input type="radio"/> |
| 14.d) - Texting/messaging using<br>a mobile phone                                              | <input type="radio"/> | <input type="radio"/> | <input type="radio"/> |
| 14.e) - Browsing the internet                                                                  | <input type="radio"/> | <input type="radio"/> | <input type="radio"/> |
| 14.f) - Using social media<br>websites/apps (Facebook,<br>Instagram, Snapchat, TikTok<br>etc.) | <input type="radio"/> | <input type="radio"/> | <input type="radio"/> |
| 14.g) - Reading books (using a<br>Kindle/other device)                                         | <input type="radio"/> | <input type="radio"/> | <input type="radio"/> |

15.) - Which of the following social media platforms do you use?

(Select all the ones you use)

- Facebook
  - Facebook Messenger
  - YouTube
  - WhatsApp
  - Instagram
  - TikTok
  - QQ
  - Snapchat
  - Pinterest
  - Reddit
  - Twitter
  - LinkedIn
  - Other
  - None
- (Select all the ones you use)

What is/are the 'other' platform(s) you use?

(Please list here )

**16.) - Thinking about when you are exploring online, how important are the following to you?****(Make one selection per statement)**

|                                                              | Strongly agree        | Somewhat agree        | Neither agree<br>nor disagree | Somewhat<br>disagree  | Strongly<br>disagree  |
|--------------------------------------------------------------|-----------------------|-----------------------|-------------------------------|-----------------------|-----------------------|
| 16.a) - Introducing me to new people                         | <input type="radio"/> | <input type="radio"/> | <input type="radio"/>         | <input type="radio"/> | <input type="radio"/> |
| 16.b) - Allowing me to connect and share with people like me | <input type="radio"/> | <input type="radio"/> | <input type="radio"/>         | <input type="radio"/> | <input type="radio"/> |
| 16.c) - Connecting me with support networks or services      | <input type="radio"/> | <input type="radio"/> | <input type="radio"/>         | <input type="radio"/> | <input type="radio"/> |
| 16.d) - Letting me express myself                            | <input type="radio"/> | <input type="radio"/> | <input type="radio"/>         | <input type="radio"/> | <input type="radio"/> |
| 16.e) - Relaxing and having fun                              | <input type="radio"/> | <input type="radio"/> | <input type="radio"/>         | <input type="radio"/> | <input type="radio"/> |

**17.) - Thinking about when you are exploring online, how important are the following to you?****(Make one selection per statement)**

|                                                                | Strongly agree        | Somewhat agree        | Neither agree<br>nor disagree | Somewhat<br>disagree  | Strongly<br>disagree  |
|----------------------------------------------------------------|-----------------------|-----------------------|-------------------------------|-----------------------|-----------------------|
| 17.a) - Improving my education<br>and learning                 | <input type="radio"/> | <input type="radio"/> | <input type="radio"/>         | <input type="radio"/> | <input type="radio"/> |
| 17.b) - Keeping me up to date<br>with news and current affairs | <input type="radio"/> | <input type="radio"/> | <input type="radio"/>         | <input type="radio"/> | <input type="radio"/> |
| 17.c) - Teaching me about issues<br>I care about               | <input type="radio"/> | <input type="radio"/> | <input type="radio"/>         | <input type="radio"/> | <input type="radio"/> |
| 17.d) - To take action on issues I<br>care about               | <input type="radio"/> | <input type="radio"/> | <input type="radio"/>         | <input type="radio"/> | <input type="radio"/> |
| 17.e) - Teaching me about<br>taking care of the environment    | <input type="radio"/> | <input type="radio"/> | <input type="radio"/>         | <input type="radio"/> | <input type="radio"/> |
| 17.f) - Providing access to health<br>information              | <input type="radio"/> | <input type="radio"/> | <input type="radio"/>         | <input type="radio"/> | <input type="radio"/> |

**18.) - Thinking about when you are exploring online, how important are the following to you?****(Make one selection per statement)**

|                                                                  | Strongly agree        | Somewhat agree        | Neither agree<br>nor disagree | Somewhat<br>disagree  | Strongly<br>disagree  |
|------------------------------------------------------------------|-----------------------|-----------------------|-------------------------------|-----------------------|-----------------------|
| 18.a) - To create content and share with others                  | <input type="radio"/> | <input type="radio"/> | <input type="radio"/>         | <input type="radio"/> | <input type="radio"/> |
| 18.b) - Strengthening my cultural identity                       | <input type="radio"/> | <input type="radio"/> | <input type="radio"/>         | <input type="radio"/> | <input type="radio"/> |
| 18.c) - Strengthening my religious identity                      | <input type="radio"/> | <input type="radio"/> | <input type="radio"/>         | <input type="radio"/> | <input type="radio"/> |
| 18.d) - Strengthening my existing relationships with my family   | <input type="radio"/> | <input type="radio"/> | <input type="radio"/>         | <input type="radio"/> | <input type="radio"/> |
| 18.e) - Letting me contribute to decision-making in my community | <input type="radio"/> | <input type="radio"/> | <input type="radio"/>         | <input type="radio"/> | <input type="radio"/> |
| 18.f) - To buy or sell things                                    | <input type="radio"/> | <input type="radio"/> | <input type="radio"/>         | <input type="radio"/> | <input type="radio"/> |
| 18.g) - Encouraging me to develop new skills                     | <input type="radio"/> | <input type="radio"/> | <input type="radio"/>         | <input type="radio"/> | <input type="radio"/> |

**19.) - Imagine that suddenly, you could no longer use any of your devices to go online.....****(Make one selection per statement)**

|                                                                    | Strongly agree        | Somewhat agree        | Neither agree<br>nor disagree | Somewhat<br>disagree  | Strongly<br>disagree  |
|--------------------------------------------------------------------|-----------------------|-----------------------|-------------------------------|-----------------------|-----------------------|
| 19.a) - I wouldn't be able to talk to my friends                   | <input type="radio"/> | <input type="radio"/> | <input type="radio"/>         | <input type="radio"/> | <input type="radio"/> |
| 19.b) - I'd get bored, there is nothing else to do                 | <input type="radio"/> | <input type="radio"/> | <input type="radio"/>         | <input type="radio"/> | <input type="radio"/> |
| 19.c) - People wouldn't like me as much                            | <input type="radio"/> | <input type="radio"/> | <input type="radio"/>         | <input type="radio"/> | <input type="radio"/> |
| 19.d) - My friends and family go online a lot so I wouldn't fit in | <input type="radio"/> | <input type="radio"/> | <input type="radio"/>         | <input type="radio"/> | <input type="radio"/> |
| 19.e) - I wouldn't be able to keep up to date with the world       | <input type="radio"/> | <input type="radio"/> | <input type="radio"/>         | <input type="radio"/> | <input type="radio"/> |
| 19.f) - I would be stressed or worried without my devices          | <input type="radio"/> | <input type="radio"/> | <input type="radio"/>         | <input type="radio"/> | <input type="radio"/> |
| 19.g) - I wouldn't be able to escape from the real world           | <input type="radio"/> | <input type="radio"/> | <input type="radio"/>         | <input type="radio"/> | <input type="radio"/> |

20.) - What do you spend most of your time doing when you're online?

- Education - school work/homework, other study
- Entertainment (not social media) - videos, tv shows, movies (Netflix, Lightbox etc), music (Spotify, Apple music etc)
- Browsing social media websites/applications
- General browsing
- Looking into things that interest you
- Buying/selling things
- Messaging/communicating
- Online gaming
- Other  
(Pick one)

Please specify:

(Please type here )

**21.) - Over the past two weeks.....****(Make one selection per statement)**

|                                                                    | All the time          | Most of the time      | More than half of the time | Less than half of the time | Some of the time      | At no time            |
|--------------------------------------------------------------------|-----------------------|-----------------------|----------------------------|----------------------------|-----------------------|-----------------------|
| 21.a) - I have felt cheerful and in good spirits                   | <input type="radio"/> | <input type="radio"/> | <input type="radio"/>      | <input type="radio"/>      | <input type="radio"/> | <input type="radio"/> |
| 21.b) - I have felt calm and relaxed                               | <input type="radio"/> | <input type="radio"/> | <input type="radio"/>      | <input type="radio"/>      | <input type="radio"/> | <input type="radio"/> |
| 21.c) - I have felt active and vigorous                            | <input type="radio"/> | <input type="radio"/> | <input type="radio"/>      | <input type="radio"/>      | <input type="radio"/> | <input type="radio"/> |
| 21.d) - I woke up feeling fresh and rested                         | <input type="radio"/> | <input type="radio"/> | <input type="radio"/>      | <input type="radio"/>      | <input type="radio"/> | <input type="radio"/> |
| 21.e) - My daily life has been filled with things that interest me | <input type="radio"/> | <input type="radio"/> | <input type="radio"/>      | <input type="radio"/>      | <input type="radio"/> | <input type="radio"/> |
